# Supplementary material for: Transcriptomic Analysis of Human Keratinocytes Treated with Galactomyces Ferment Filtrate, a Beneficial Cosmetic Ingredient
Source: MDPI journal article supplement (doi:10.3390/jcm11164645), 2022-08-09
Supplement: s1 [file s1]

Supplementary Table S1. Genes upregulated<sup>#</sup> by different lots of GFF (1.2–1.5-fold)

| Gene       | Lot 1 | Lot 2 | Lot 3 | Gene                                                                | Lot 1 | Lot 2 | Lot 3 | Gene     | Lot 1 | Lot 2 | Lot 3 |
|------------|-------|-------|-------|---------------------------------------------------------------------|-------|-------|-------|----------|-------|-------|-------|
| LYAR       | 1.452 | 1.474 | 1.443 | SLC25A15                                                            | 1.304 | 1.314 | 1.323 | ESF1     | 1.289 | 1.215 | 1.267 |
| GRHL3      | 1.421 | 1.472 | 1.423 | TPD52L1                                                             | 1.350 | 1.334 | 1.254 | ATAD3A   | 1.288 | 1.223 | 1.254 |
| PLAUR      | 1.476 | 1.424 | 1.382 | CRCT1                                                               | 1.359 | 1.322 | 1.252 | MRT04    | 1.226 | 1.258 | 1.281 |
| HS3ST1     | 1.467 | 1.441 | 1.368 | CTPS1                                                               | 1.297 | 1.362 | 1.271 | CMTM7    | 1.260 | 1.254 | 1.249 |
| S100A8     | 1.454 | 1.390 | 1.427 | KRT8                                                                | 1.350 | 1.276 | 1.302 | RABGGTB  | 1.275 | 1.223 | 1.260 |
| ID3        | 1.378 | 1.432 | 1.445 | PNPT1                                                               | 1.297 | 1.328 | 1.301 | IFRD2    | 1.209 | 1.262 | 1.282 |
| S100A9     | 1.413 | 1.383 | 1.431 | EMP1                                                                | 1.339 | 1.303 | 1.282 | NOP2     | 1.202 | 1.254 | 1.298 |
| METRNL     | 1.351 | 1.447 | 1.408 | NDUFAF4                                                             | 1.311 | 1.318 | 1.293 | RRP9     | 1.269 | 1.231 | 1.247 |
| NOLC1      | 1.469 | 1.402 | 1.333 | POLR1B                                                              | 1.310 | 1.310 | 1.288 | COA4     | 1.257 | 1.243 | 1.247 |
| DDX21      | 1.398 | 1.380 | 1.418 | C1orf74                                                             | 1.322 | 1.272 | 1.314 | MIR1292  | 1.233 | 1.249 | 1.265 |
| PNO1       | 1.387 | 1.405 | 1.394 | RPF2                                                                | 1.333 | 1.280 | 1.289 | CRABP2   | 1.259 | 1.262 | 1.223 |
| NOP16      | 1.446 | 1.364 | 1.370 | PPAN                                                                | 1.355 | 1.301 | 1.244 | ISG20L2  | 1.229 | 1.251 | 1.264 |
| MYC        | 1.357 | 1.422 | 1.374 | TAGLN                                                               | 1.329 | 1.294 | 1.275 | SNORD17  | 1.267 | 1.229 | 1.247 |
| LAMA2      | 1.443 | 1.376 | 1.333 | ADRB2                                                               | 1.321 | 1.298 | 1.276 | PDCD11   | 1.220 | 1.262 | 1.257 |
| MACC1      | 1.369 | 1.426 | 1.352 | SLC25A32                                                            | 1.351 | 1.283 | 1.261 | PA2G4    | 1.230 | 1.244 | 1.261 |
| OVOL1      | 1.433 | 1.394 | 1.317 | A2ML1                                                               | 1.316 | 1.325 | 1.250 | PFDN2    | 1.223 | 1.256 | 1.253 |
| CCND1      | 1.358 | 1.394 | 1.391 | BYSL                                                                | 1.241 | 1.320 | 1.330 | RFK      | 1.265 | 1.233 | 1.232 |
| RRS1       | 1.421 | 1.396 | 1.320 | ZMYND19                                                             | 1.325 | 1.255 | 1.307 | MYBBP1A  | 1.283 | 1.237 | 1.206 |
| IL1R2      | 1.441 | 1.350 | 1.321 | PHLDA2                                                              | 1.334 | 1.283 | 1.267 | AKAP2    | 1.263 | 1.207 | 1.251 |
| IL1B       | 1.373 | 1.403 | 1.332 | LTV1                                                                | 1.298 | 1.293 | 1.290 | C19orf48 | 1.269 | 1.238 | 1.213 |
| KRT34      | 1.407 | 1.402 | 1.298 | NRG1                                                                | 1.295 | 1.300 | 1.278 | BCCIP    | 1.264 | 1.234 | 1.222 |
| THBS1      | 1.372 | 1.351 | 1.382 | DKC1                                                                | 1.355 | 1.274 | 1.244 | METAP2   | 1.248 | 1.219 | 1.252 |
| GADD45A    | 1.355 | 1.376 | 1.374 | LOX                                                                 | 1.358 | 1.253 | 1.261 | BCL2L1   | 1.261 | 1.211 | 1.247 |
| KCTD12     | 1.377 | 1.330 | 1.395 | CIRH1A                                                              | 1.261 | 1.310 | 1.300 | SLC25A33 | 1.227 | 1.267 | 1.225 |
| IL36G      | 1.357 | 1.396 | 1.348 | HES2                                                                | 1.226 | 1.349 | 1.295 | SCD5     | 1.213 | 1.241 | 1.262 |
| SNX5       | 1.432 | 1.361 | 1.307 | CCDC86                                                              | 1.294 | 1.287 | 1.289 | TRMT6    | 1.262 | 1.230 | 1.216 |
| WDR3       | 1.374 | 1.360 | 1.366 | GNL3                                                                | 1.269 | 1.314 | 1.284 | MRPS30   | 1.241 | 1.241 | 1.223 |
| PVRL4      | 1.344 | 1.412 | 1.331 | DBNDD2                                                              | 1.284 | 1.314 | 1.269 | PTRH2    | 1.254 | 1.206 | 1.242 |
| POLR3G     | 1.412 | 1.343 | 1.327 | RPS14                                                               | 1.352 | 1.279 | 1.233 | SLC2A14  | 1.241 | 1.213 | 1.248 |
| GCLM       | 1.365 | 1.384 | 1.320 | RND3                                                                | 1.344 | 1.243 | 1.273 | TM4SF1   | 1.218 | 1.241 | 1.243 |
| HES1       | 1.331 | 1.382 | 1.350 | EXOSC4                                                              | 1.274 | 1.316 | 1.270 | NAT10    | 1.241 | 1.232 | 1.221 |
| BRIX1      | 1.352 | 1.352 | 1.359 | KIAA0020                                                            | 1.283 | 1.296 | 1.275 | NUDCD1   | 1.254 | 1.210 | 1.229 |
| TGM1       | 1.412 | 1.394 | 1.257 | FAM136A                                                             | 1.252 | 1.289 | 1.313 | NMD3     | 1.254 | 1.236 | 1.202 |
| DUSP5      | 1.376 | 1.320 | 1.362 | CCNB1IP1                                                            | 1.268 | 1.338 | 1.245 | MINA     | 1.249 | 1.231 | 1.211 |
| PROSER2    | 1.367 | 1.355 | 1.334 | TSR1                                                                | 1.298 | 1.275 | 1.270 | NTMT1    | 1.213 | 1.274 | 1.202 |
| DUSP4      | 1.390 | 1.344 | 1.320 | GRPEL1                                                              | 1.327 | 1.273 | 1.243 | GART     | 1.270 | 1.202 | 1.217 |
| FABP5      | 1.289 | 1.352 | 1.410 | RFC3                                                                | 1.309 | 1.275 | 1.255 | TIPIN    | 1.218 | 1.233 | 1.239 |
| TXNRD1     | 1.397 | 1.385 | 1.267 | SLC20A1                                                             | 1.344 | 1.270 | 1.223 | MRPS17   | 1.227 | 1.254 | 1.205 |
| SBSN       | 1.300 | 1.413 | 1.321 | SFXN4                                                               | 1.268 | 1.296 | 1.268 | BID      | 1.254 | 1.208 | 1.222 |
| SCEL       | 1.359 | 1.342 | 1.332 | PAK1IP1                                                             | 1.317 | 1.275 | 1.239 | PPRC1    | 1.235 | 1.204 | 1.245 |
| FAM25A     | 1.351 | 1.401 | 1.279 | EIF3B                                                               | 1.297 | 1.257 | 1.268 | WDR74    | 1.208 | 1.268 | 1.206 |
| SRM        | 1.339 | 1.311 | 1.359 | PROCR                                                               | 1.242 | 1.319 | 1.247 | IL1RN    | 1.207 | 1.220 | 1.254 |
| ADGRF1     | 1.375 | 1.363 | 1.263 | AMOTL2                                                              | 1.234 | 1.259 | 1.311 | SNHG1    | 1.219 | 1.224 | 1.235 |
| FKBP4      | 1.303 | 1.351 | 1.339 | ARRDC4                                                              | 1.211 | 1.323 | 1.269 | CSNK1E   | 1.247 | 1.223 | 1.206 |
| CXorf49    | 1.295 | 1.332 | 1.360 | NSUN2                                                               | 1.315 | 1.255 | 1.233 | TACSTD2  | 1.236 | 1.225 | 1.205 |
| B4GALT4    | 1.327 | 1.345 | 1.314 | PUS1                                                                | 1.311 | 1.269 | 1.218 | UMPS     | 1.220 | 1.235 | 1.206 |
| ERVMER34-1 | 1.346 | 1.311 | 1.318 | MRPS2                                                               | 1.284 | 1.266 | 1.245 | HSPD1    | 1.235 | 1.207 | 1.218 |
| PDCD2L     | 1.297 | 1.370 | 1.308 | TRAP1                                                               | 1.278 | 1.276 | 1.237 | ALAS1    | 1.239 | 1.212 | 1.206 |
| UPP1       | 1.382 | 1.289 | 1.299 | RIOK1                                                               | 1.264 | 1.241 | 1.287 | EPHA2    | 1.222 | 1.207 | 1.226 |
| SPRR2D     | 1.330 | 1.370 | 1.268 | TFRC                                                                | 1.356 | 1.221 | 1.213 | PITPNC1  | 1.202 | 1.226 | 1.227 |
| SLC25A19   | 1.305 | 1.336 | 1.326 | RPL27A                                                              | 1.256 | 1.255 | 1.276 | TEX10    | 1.227 | 1.220 | 1.207 |
| GTPBP4     | 1.344 | 1.329 | 1.291 | OCLN                                                                | 1.259 | 1.268 | 1.261 | PRPF4    | 1.223 | 1.216 | 1.214 |
| YRDC       | 1.348 | 1.308 | 1.304 | NIP7                                                                | 1.268 | 1.266 | 1.252 | ASUN     | 1.210 | 1.219 | 1.220 |
| JPH1       | 1.322 | 1.342 | 1.296 | RSL1D1                                                              | 1.250 | 1.235 | 1.295 | POLR1E   | 1.213 | 1.231 | 1.205 |
| GEMIN5     | 1.272 | 1.326 | 1.356 | WDR77                                                               | 1.265 | 1.244 | 1.269 | RUVBL1   | 1.203 | 1.202 | 1.239 |
| SERPINB13  | 1.242 | 1.395 | 1.316 | VGLL3                                                               | 1.312 | 1.223 | 1.242 | EIF3J    | 1.220 | 1.211 | 1.203 |
| WDR43      | 1.350 | 1.300 | 1.302 | TXNIP                                                               | 1.213 | 1.253 | 1.310 | GNL2     | 1.203 | 1.213 | 1.206 |
| GPATCH4    | 1.367 | 1.319 | 1.265 | SDCCAG3                                                             | 1.240 | 1.286 | 1.247 | NLN      | 1.207 | 1.203 | 1.203 |
| MARS2      | 1.376 | 1.288 | 1.277 | #All genes are significantly upregulated by GFFs (P value < 0.001). |       |       |       |          |       |       |       |

Genes upregulated more than 1.2- to 1.5-fold compared with the control are listed.

Supplementary Table S2. Genes downregulated<sup>#</sup> by different lots of GFF (0.75–0.8-fold)

|                | Lot 1 | Lot 2 | Lot 3 |
|----------------|-------|-------|-------|
| <i>ITGAV</i>   | 0.754 | 0.754 | 0.766 |
| <i>CA12</i>    | 0.777 | 0.752 | 0.762 |
| <i>DNER</i>    | 0.776 | 0.763 | 0.755 |
| <i>P4HA2</i>   | 0.760 | 0.770 | 0.766 |
| <i>ITGB6</i>   | 0.751 | 0.788 | 0.758 |
| <i>ERAP1</i>   | 0.778 | 0.763 | 0.768 |
| <i>ECH1</i>    | 0.762 | 0.759 | 0.798 |
| <i>PDGFC</i>   | 0.762 | 0.770 | 0.791 |
| <i>KANK2</i>   | 0.780 | 0.756 | 0.794 |
| <i>ERAP2</i>   | 0.763 | 0.782 | 0.793 |
| <i>ZNF395</i>  | 0.772 | 0.768 | 0.799 |
| <i>SSBP3</i>   | 0.765 | 0.797 | 0.778 |
| <i>TP63</i>    | 0.780 | 0.766 | 0.794 |
| <i>FBXO16</i>  | 0.760 | 0.784 | 0.796 |
| <i>DNAJB11</i> | 0.782 | 0.774 | 0.785 |
| <i>SECTM1</i>  | 0.753 | 0.797 | 0.792 |
| <i>CREB3L2</i> | 0.782 | 0.774 | 0.791 |
| <i>CROCC</i>   | 0.800 | 0.781 | 0.781 |
| <i>TLL1</i>    | 0.796 | 0.787 | 0.789 |
| <i>SLITRK6</i> | 0.799 | 0.796 | 0.792 |

<sup>#</sup>All genes are significantly downregulated by GFFs (P value < 0.001).

Genes downregulated to less than 0.8- to 0.75-fold compared with the control are listed.
